# Supplementary material
Source: PubMed Central journal article supplement (PMC2884268)
Supplement: NIHMS210111-supplement-Supplementary.pdf [file NIHMS210111-supplement-Supplementary.pdf]

## Supplementary Material

### Density functional calculations of chemical shielding of backbone $^{15}\text{N}$ in helical residues of protein G

Ling Cai, David Fushman, and Daniel S. Kosov

**Supplementary Table S1.** Computed dipole moments (in Debye) for the various models in the vacuum calculation

| Residue | Model A<br>neutral | Model B<br>neutral $-\text{CH}_3$ | Model C<br>neutral $-\text{CH}_3$ |
|---------|--------------------|-----------------------------------|-----------------------------------|
| A26     | 10.47              | 21.67                             | 31.26                             |
| E27     | 10.40              | 29.41                             | 41.95                             |
| K28     | 11.28              | 29.55                             | 39.49                             |
| A29     | 9.10               | 28.52                             | 39.04                             |
| F30     | 9.73               | 29.40                             | 39.32                             |
| K31     | 8.22               | 28.52                             | 38.58                             |
| Q32     | 5.73               | 26.24                             | 36.86                             |
| Y33     | 5.71               | 25.23                             | 33.98                             |

**Supplementary Table S2.** Characteristics of the calculated  $^{15}\text{N}$  chemical shielding tensor for selected residues. The definitions of the Euler angles  $\alpha$ ,  $\beta$ ,  $\gamma$  and  $A_1$ ,  $A_2$ ,  $A_3$  are in (Cai et al. 2008). The principal values of the tensor are in ppm, the angles are in degrees.

| "Model C neutral" |               |               |               |          |         |          |       |       |       |
|-------------------|---------------|---------------|---------------|----------|---------|----------|-------|-------|-------|
| Residue           | $\sigma_{11}$ | $\sigma_{22}$ | $\sigma_{33}$ | $\alpha$ | $\beta$ | $\gamma$ | $A_1$ | $A_2$ | $A_3$ |
| A26               | 14.14         | 155.28        | 197.2         | -4.42    | 15.06   | -3.19    | 86.81 | 12.83 | 77.58 |
| E27               | 21.57         | 162.81        | 191.13        | -7.67    | 17.16   | -2.74    | 87.26 | 15.65 | 74.61 |
| K28               | 19.52         | 160.76        | 194.91        | -7.63    | 17.19   | -0.35    | 89.65 | 7.67  | 82.34 |
| A29               | 19.64         | 161.51        | 196.08        | -14.22   | 14.97   | -3.48    | 86.52 | 12.38 | 78.14 |
| F30               | 25.06         | 160.73        | 193.85        | -9.48    | 19.04   | 0.51     | 89.49 | 15.48 | 74.53 |
| K31               | 7.59          | 163.19        | 187.04        | -8.93    | 18.10   | -1.69    | 88.31 | 24.32 | 65.75 |
| Q32               | 19.23         | 160.88        | 196.49        | 0.02     | 15.73   | -1.71    | 88.29 | 18.67 | 71.41 |
| Y33               | 13.61         | 160.89        | 188.36        | -6.12    | 17.22   | -1.80    | 88.20 | 11.95 | 78.19 |

| Model C |               |               |               |          |         |          |       |       |       |
|---------|---------------|---------------|---------------|----------|---------|----------|-------|-------|-------|
| Residue | $\sigma_{11}$ | $\sigma_{22}$ | $\sigma_{33}$ | $\alpha$ | $\beta$ | $\gamma$ | $A_1$ | $A_2$ | $A_3$ |
| A26     | 8.60          | 158.04        | 193.56        | -11.27   | 15.17   | -2.55    | 87.45 | 17.03 | 73.17 |
| E27     | 1.53          | 159.82        | 180.58        | -17.78   | 16.26   | -2.38    | 87.62 | 24.82 | 65.31 |
| K28     | 26.40         | 160.47        | 198.37        | -5.28    | 18.16   | -0.42    | 89.58 | 5.53  | 84.49 |
| A29     | 13.18         | 161.31        | 192.12        | -17.44   | 15.04   | -3.58    | 86.42 | 15.87 | 74.56 |
| F30     | 23.32         | 160.14        | 191.58        | -10.35   | 18.50   | 0.81     | 89.19 | 15.63 | 74.39 |
| K31     | 15.74         | 163.45        | 190.33        | -6.32    | 18.74   | -1.38    | 88.62 | 20.2  | 69.85 |
| Q32     | 14.80         | 159.47        | 193.82        | -1.56    | 15.81   | -2.29    | 87.71 | 22.35 | 67.78 |
| Y33     | 22.96         | 159.13        | 192.26        | -4.68    | 16.28   | -1.29    | 88.71 | 9.06  | 81.03 |

**Supplementary Table S3.** The effect of the side chain charges on the chemical shielding of the amide nitrogens of interest in GB3. Shown are the distances (in Å) between the center of the side chain charge (C $\gamma$  of Asp, C $\delta$  of Glu,  $\epsilon$ -amine N of Lys) of all ionizable helical residues in GB3 (indicated in the left column for each row) and the amide nitrogens of the residues under examination (A26 to Y33, indicated on top of each column). Shown in blue for each amide is the distance to the charge (two for Q32) that was not included in the corresponding 8-residue long-chain fragment but would be necessary in order to neutralize the charge of its salt-bridge partner. The bottom row shows the change in  $^{15}\text{N}$  chemical shielding (in ppm) caused by the inclusion of such charges into a dipeptide model calculation. The fragment used for K28 already was neutral. Point charges of -1 (for Asp and Glu) or 1 (for Lys) were placed at the coordinate of the charge center atom in the dipeptide model. Doing so allowed us to estimate the effect of these “side-chain counterions” on the chemical shielding of the amide nitrogen of interest. As discussed in the main text, no significant effect was observed except for E27, in which case K31 was finally included in the (extended) Model C calculation.

|                      | A26   | E27   | K28   | A29   | F30   | K31   | Q32   | Y33   |
|----------------------|-------|-------|-------|-------|-------|-------|-------|-------|
| D22                  | 5.74  | 7.69  | 8.83  | 10.04 | 11.79 | 13.29 | 14.66 | 16.09 |
| E24                  | 7.45  | 7.95  | 7.70  | 9.79  | 11.85 | 12.28 | 13.35 | 15.51 |
| E27                  | 7.30  | 4.97  | 4.82  | 7.45  | 7.73  | 6.83  | 8.84  | 10.99 |
| K28                  | 7.44  | 7.72  | 6.18  | 7.77  | 10.24 | 10.45 | 10.80 | 13.07 |
| K31                  | 10.41 | 7.82  | 6.87  | 8.84  | 8.49  | 6.36  | 7.95  | 10.17 |
| D36                  | 14.91 | 13.90 | 12.15 | 10.14 | 9.40  | 8.81  | 6.46  | 4.88  |
| $\Delta\sigma$ , ppm | 0.21  | 4.77  | N/A   | 1.08  | 0.12  | -0.89 | 1.96  | 0.20  |
